# Supplementary material for: Decreased Expression of Soluble Epoxide Hydrolase Suppresses Murine Choroidal Neovascularization
Source: MDPI journal article supplement (doi:10.3390/ijms232415595), 2022-12-09
Supplement: s1 [file s1]

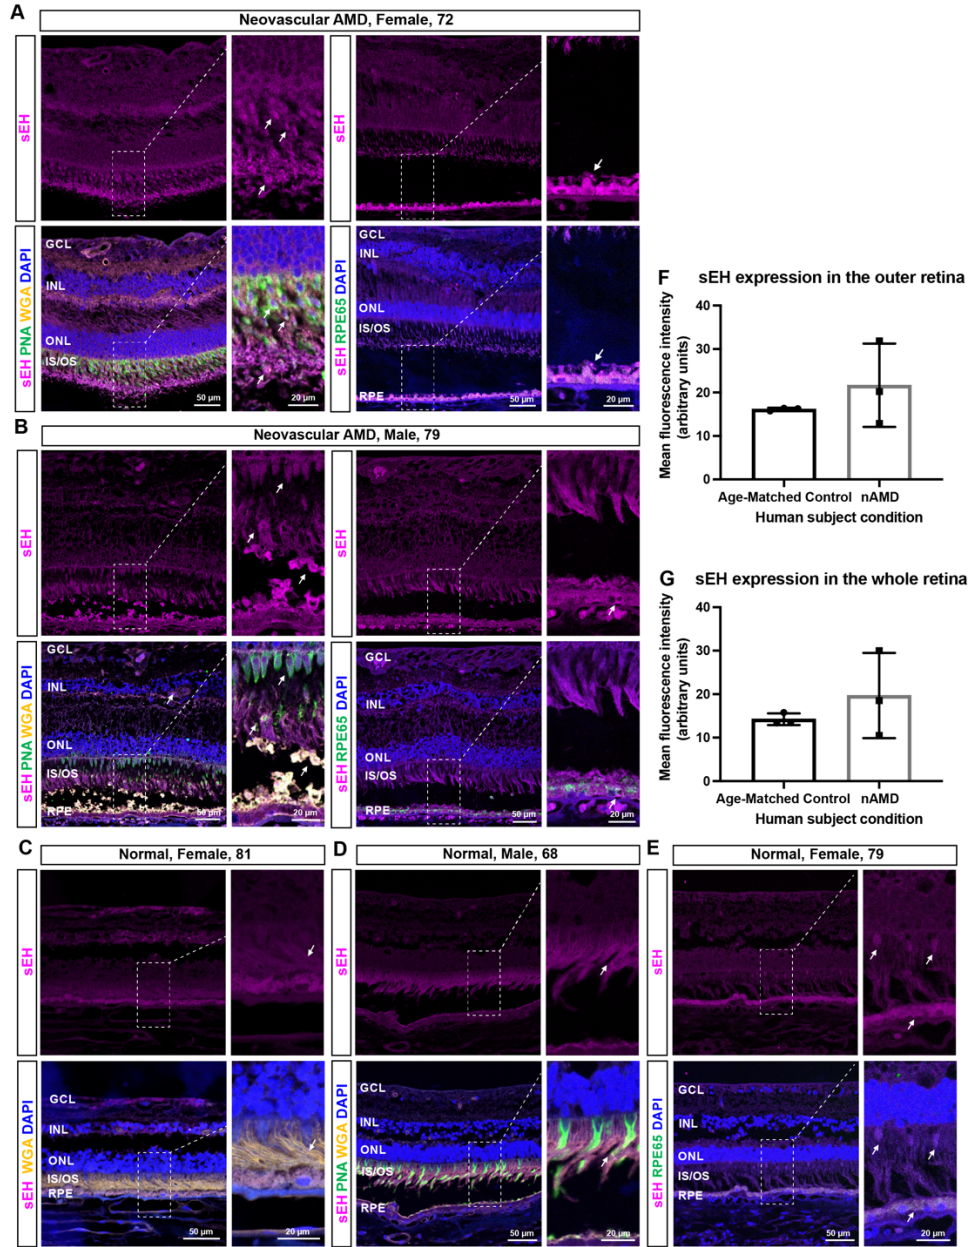

**Figure S1.** Further images of sEH immunostaining in human retina. Images of retinal sections from two additional human neovascular AMD eyes, (A) 72 y.o., female and (B) 79 y.o., male; and control eyes (C) 81 y.o., female, (D) 68 y.o., male, (E) 79 y.o., female, stained with DAPI (blue), sEH (magenta), peanut agglutinin (PNA) (cone photoreceptors; green), wheat germ agglutinin (WGA) (rod photoreceptors; yellow), or RPE65 (retinal pigment epithelium; green). Labeling of retinal tissues with PNA and WGA for rods and cones, and with RPE65 show colocalization of sEH in photoreceptors and RPE. In neovascular AMD, sEH is increased in the (F) outer and (G) total retina as demonstrated by mean fluorescence intensity (MFI) quantification. Insets show higher magnification images of the indicated areas. Scale bars as indicated. GCL, ganglion cell layer; INL, inner nuclear layer; ONL, outer nuclear layer; IS/OS, photoreceptor inner segments/outer segments; RPE, retinal pigment epithelium.

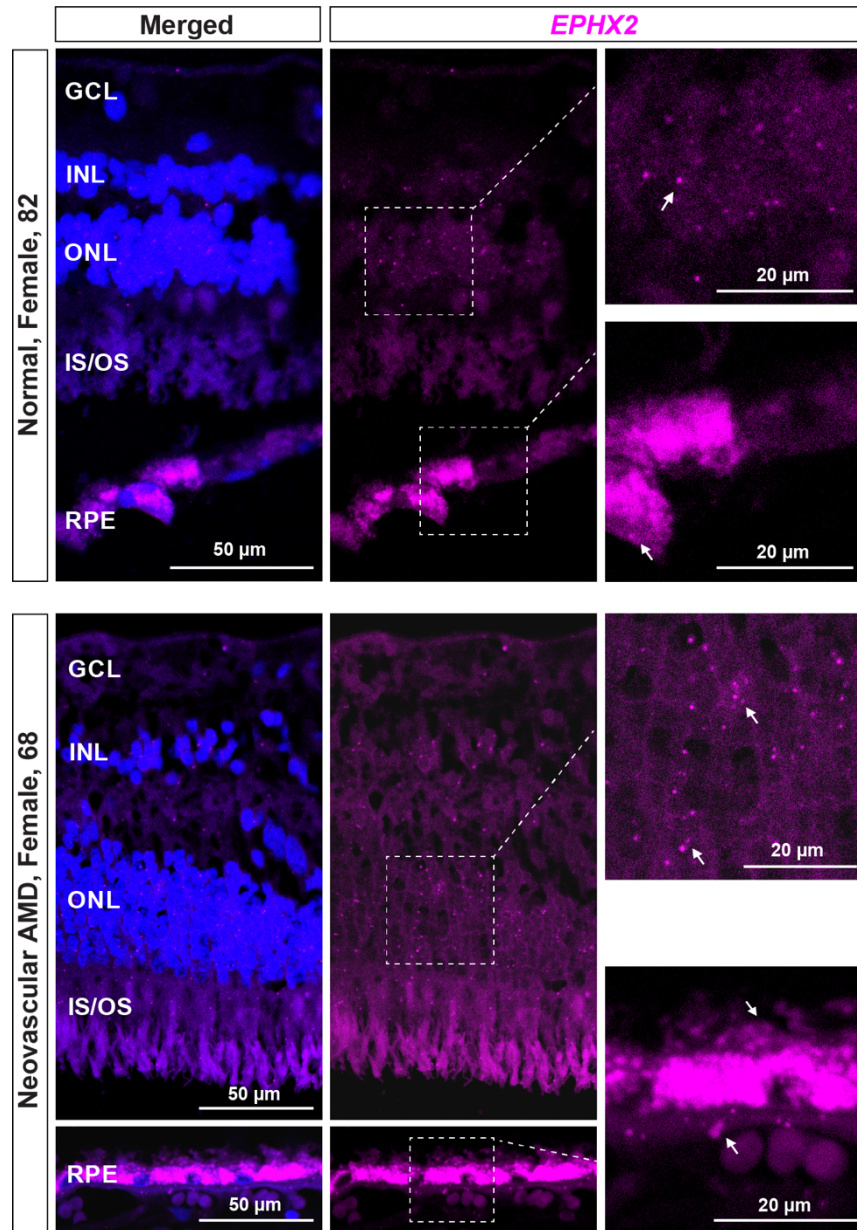

**Figure S2.** Further images of RNAscope detection of *EPHX2* mRNA in human retina. *EPHX2* encoding sEH is in magenta and nuclei (DAPI) are in blue. Insets show higher magnification images of the indicated areas. Scale bars as indicated. *EPHX2* mRNA is highly expressed in the photoreceptor cell bodies in the outer nuclear layer and in the RPE. GCL, ganglion cell layer; INL, inner nuclear layer; ONL, outer nuclear layer; RPE, retinal pigment epithelium.

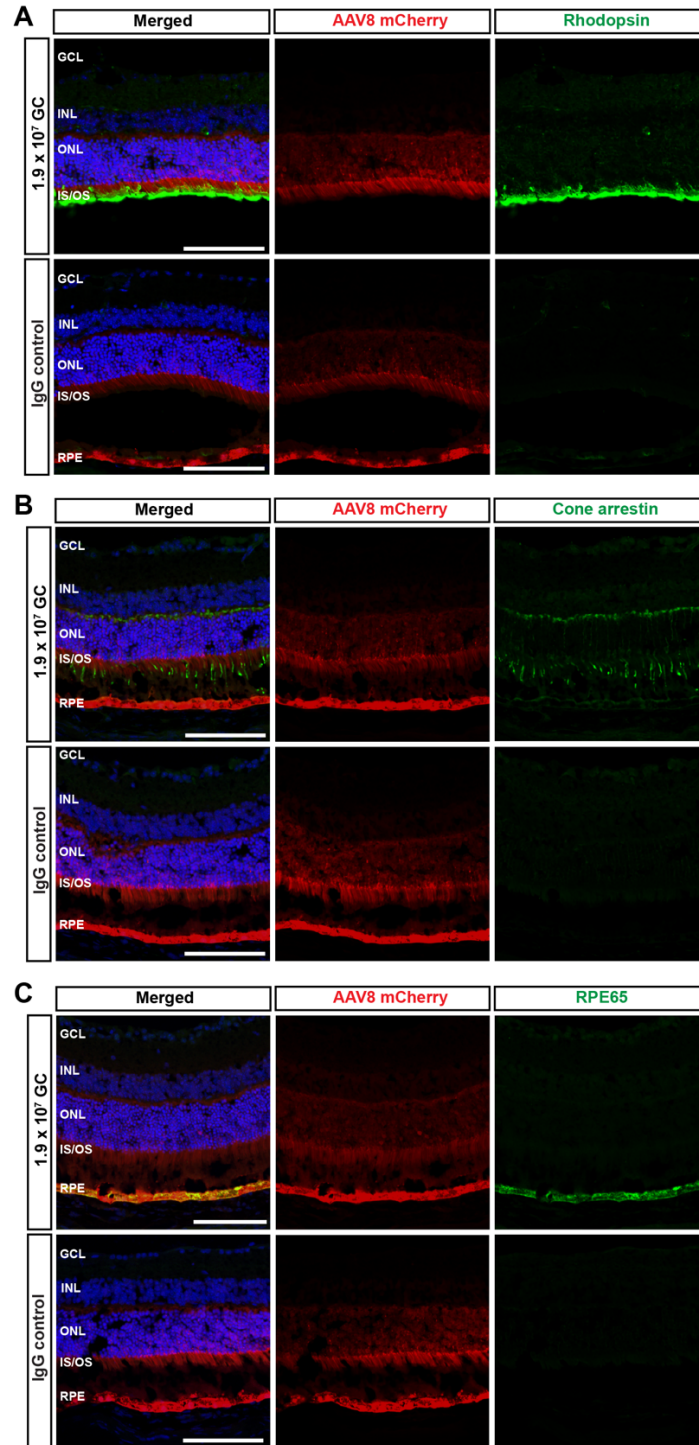

**Figure S3.** Immunolocalization of AAV8 mCherry with cone arrestin, rhodopsin and RPE65 in AAV8 injected murine eyes. Five weeks after intravitreal injection, AAV8 transduction (mCherry; red) was observed associated with (A) rod photoreceptor cells (rhodopsin, which stains outer segments; green), (B) cone photoreceptor cells (cone arrestin; green) and (C) RPE cells (RPE65; green). Nuclei (DAPI) are blue. GCL, ganglion cell layer; INL, inner nuclear layer; ONL, outer nuclear layer; IS/OS, photoreceptor inner segments/outer segments; RPE, retinal pigment epithelium. Scale bars = 100  $\mu$ m.



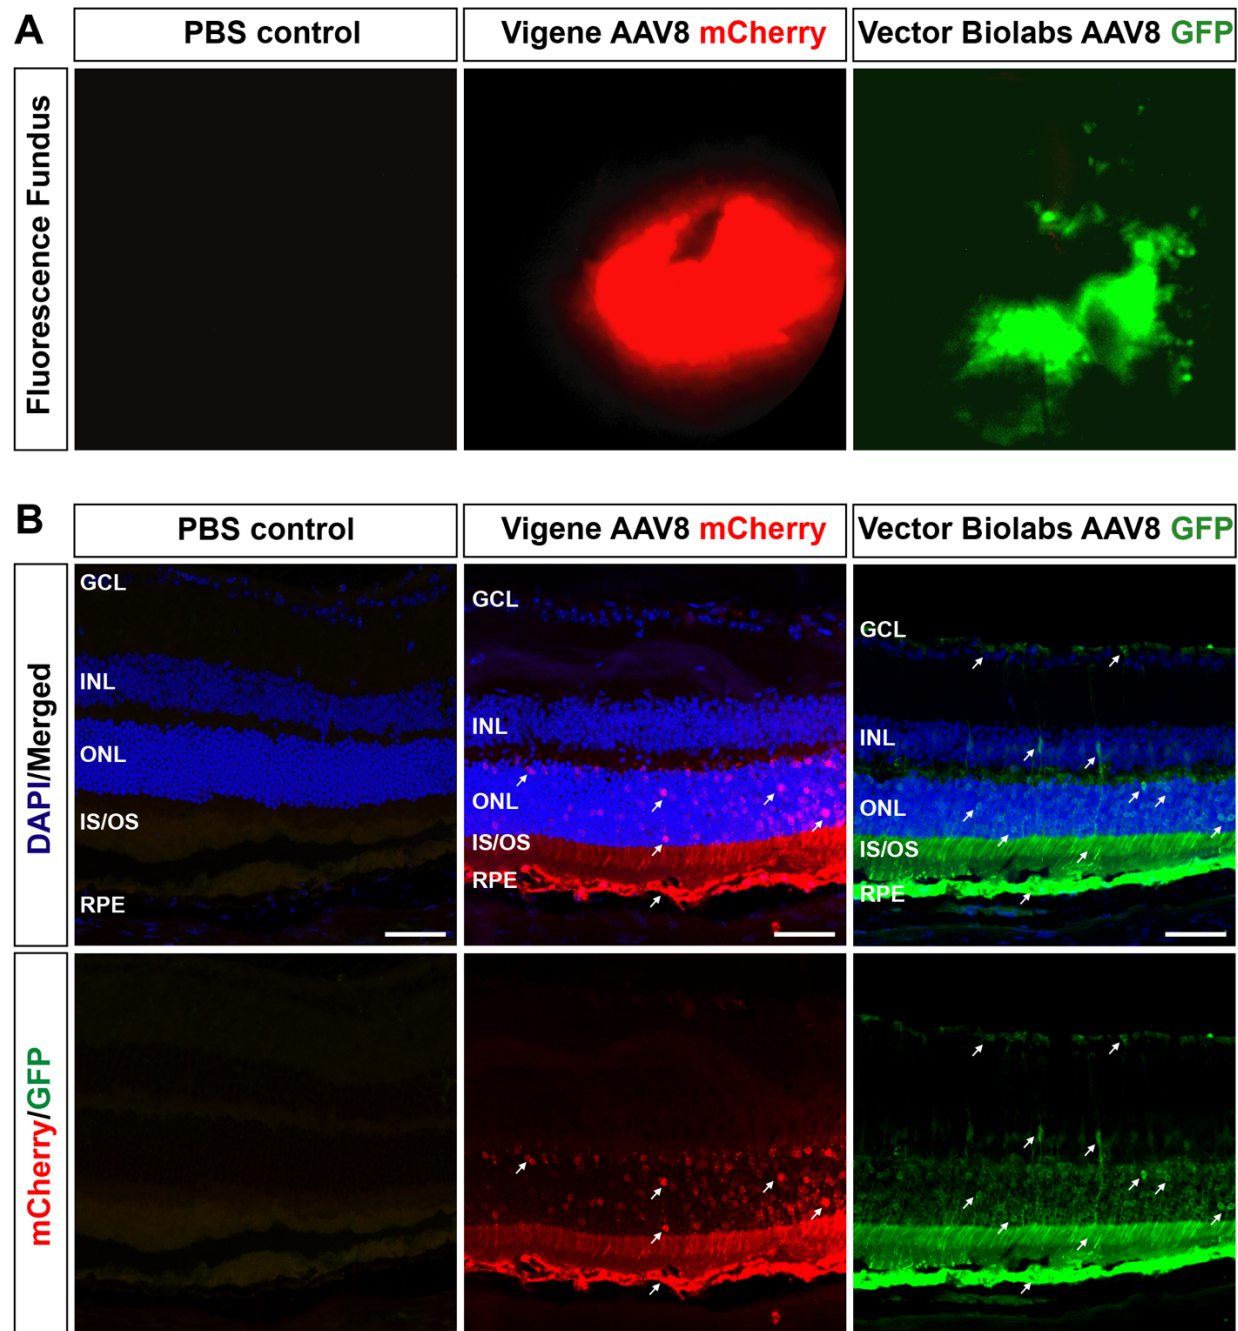

**Figure S4.** Comparison of AAV8 vectors from different suppliers. Three weeks after intravitreal injection of  $1.9 \times 10^7$  GC of viral particles, AAV8 transduction (mCherry, red, Vigene or GFP, green, Vector Biolabs) was observed. **(A)** Fluorescence funduscopy showing in vivo mCherry expression and GFP expression in wide view image of fundus. **(B)** Localization of transduced cells is shown in retinal sections. The mCherry positive cells transduced by the Vigene AAV8 are localized to ONL, IS/OS and RPE, whereas the GFP positive cells transduced by the Vector Biolabs AAV8 are likewise detected in ONL, IS/OS and (prominently) RPE, but also some GCL and INL cells. GCL, ganglion cell layer; INL, inner nuclear layer; ONL, outer nuclear layer; RPE, retinal pigment epithelium. Scale bars = 100  $\mu$ m.



**A-E: PBS control**

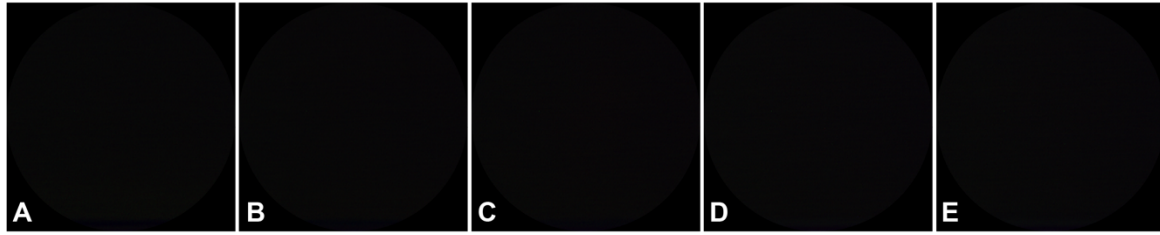

**F-K: Scrambled shRNA control**

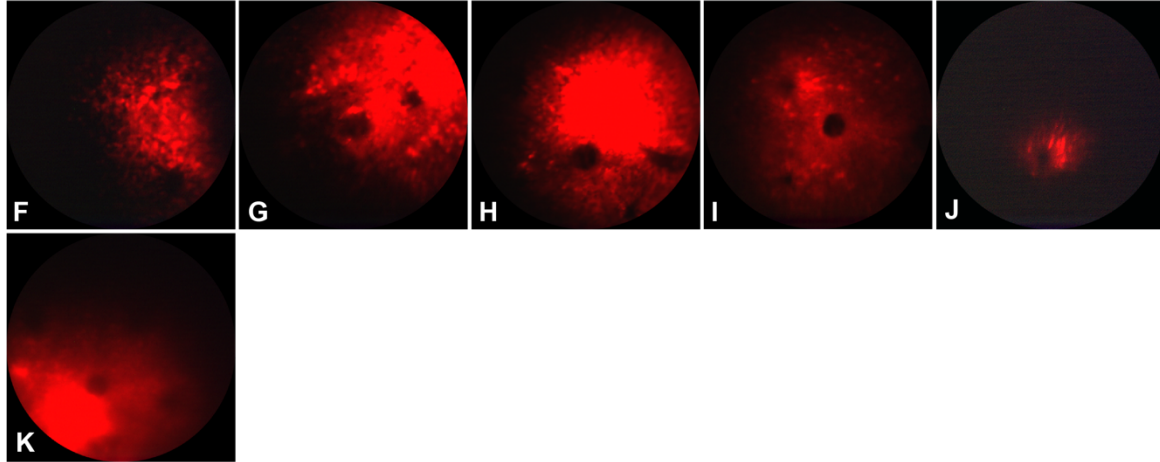

**L-U: *Ephx2* shRNA**

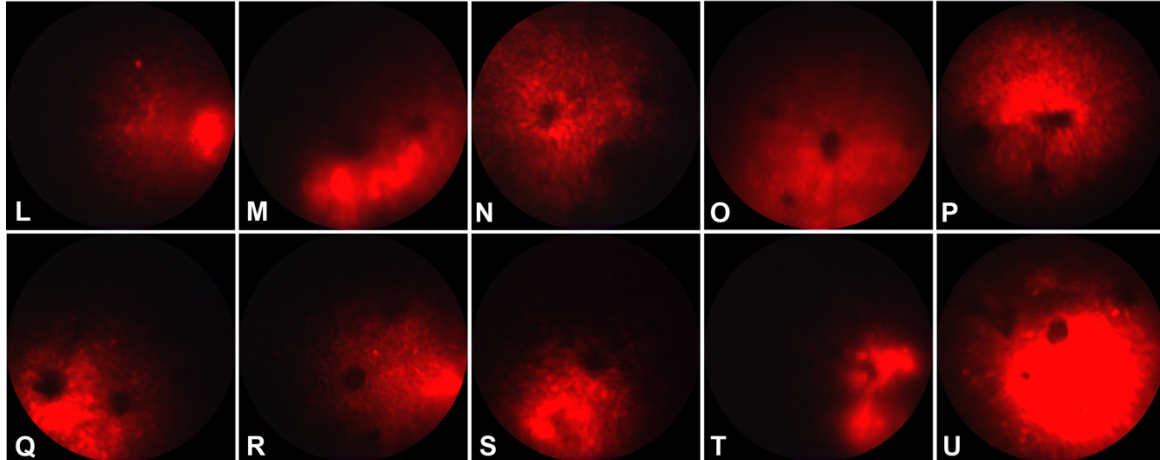

**Figure S5.** Fundus images of mCherry fluorescence in mice with L-CNV. mCherry fluorescence fundus images on day 21 (14 days post laser) of mouse eyes of PBS vehicle control (A-E), AAV8 viral vectors encoding scrambled shRNA control (F-K), and *Ephx2* shRNA (L-U).

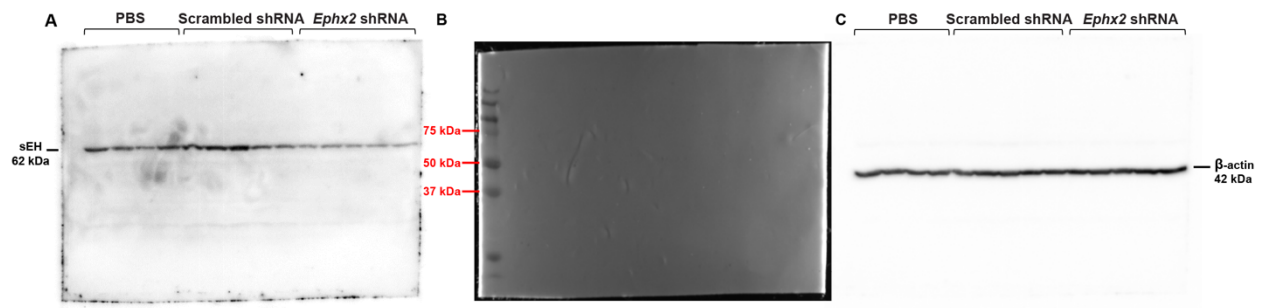

**Figure S6.** Full length immunoblot images from retina samples shown in Figure 7A. **(A)** Full length immunoblot image of sEH expression. **(B)** Molecular weight marker image. **(C)** Full length immunoblot image of  $\beta$ -actin expression.

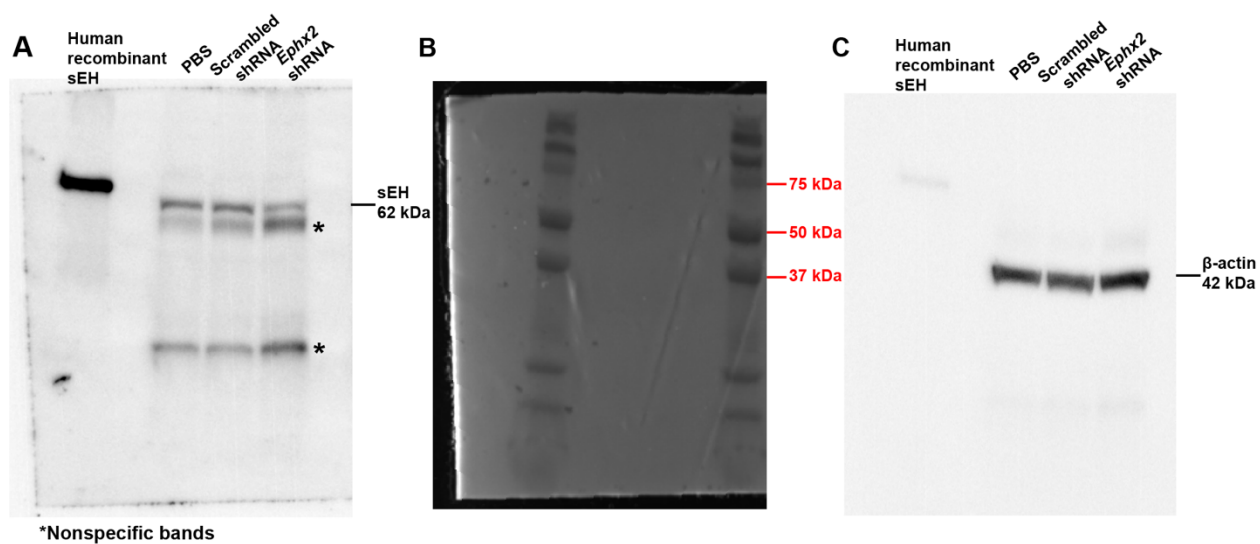

**Figure S7.** Full length immunoblot images from the pooled RPE/choroid samples shown in Figure 7B. (A) Full length immunoblot image of sEH expression. As positive control, purified human recombinant sEH was used. \*Indicates nonspecific bands. (B) Molecular weight marker image. (C) Full length immunoblot image of  $\beta$ -actin expression.



**Table S1. Antibody and lectin information for the human and mouse retina immunofluorescence and immunoblotting (IB; indicated in parentheses).**

| Antigen/Lectin                                       | Catalog # | Supplier      | Dilution ratio (1:N) |                |
|------------------------------------------------------|-----------|---------------|----------------------|----------------|
|                                                      |           |               | Human retina         | Mouse retina   |
| Soluble epoxide hydrolase (sEH)                      | A5        | Santa Cruz    | 100                  | 400, 1000 (IB) |
| Peanut agglutinin (PNA)                              | L6135     | Sigma         | 250                  | N/A            |
| Wheat germ agglutinin (WGA)                          | W32466    | Thermo Fisher | 250                  | N/A            |
| Retinal pigment epithelium-specific 65 (RPE65)       | ab231782  | Abcam         | 400                  | 500            |
| Rhodopsin                                            | ab3424    | Abcam         | N/A                  | 300            |
| Cone arrestin                                        | AB15282   | Millipore     | N/A                  | 500            |
| <i>Griffonia simplicifolia</i> isolectin B4 (GS-IB4) | I21411    | Thermo Fisher | N/A                  | 250            |
| $\beta$ -actin                                       | AC-49     | Sigma-Aldrich | N/A                  | 5000 (IB)      |

**Table S2. TaqMan gene expression assays (Thermo) used in this study.**

| Target       | Assay ID      |
|--------------|---------------|
| <i>Ccl2</i>  | Mm00441242_m1 |
| <i>Ephx2</i> | Mm01313813_m1 |
| <i>Hprt</i>  | Mm03024075_m1 |
| <i>Icam1</i> | Mm00516023_m1 |
| <i>Il1b</i>  | Mm00434228_m1 |
| <i>Il6</i>   | Mm00446190_m1 |
| <i>Tbp</i>   | Mm01277042_m1 |
| <i>Tnfa</i>  | Mm00443258_m1 |
| <i>Vegfc</i> | Mm00437310_m1 |
